# Supplementary material for: Organizational innovation: a comprehensive model for catalyzing organizational development and change in a rapidly changing world
Source: Springer Nature journal article supplement (doi:10.1186/s40604-015-0021-6), 2015-06-04
Supplement: MOESM1 [file 11901860]

الابتكار التنظيمي : " نموذج شامل " لتحفيز التنمية التنظيمية والتغيير في عالم سريع التغير

الكاتب (ة)

ملخص

تبين البحوث السابقة اهمية الابتكارات التنظيمية للحصول على ميزة تنافسية طويلة المدى و اكتشاف الابتكارات التقنية. وعلى الرغم من ذلك تبقى معرفتنا بالابتكارات التنظيمية بسيطة وتستعمل بطريقة سيئة وغير مفهومة. وينطبق هذا بالخصوص على المسار الذى يتم بواسطته إنشاء نشر واستخدام الابتكارات التنظيمية. لذلك اكدت البحوث السابقة على ضرورة فهم آليات تحفيز التنمية التنظيمية والتغيير بطريقة أكثر شمولية.

الغرض من هذه الورقة هو وضع نموذج شامل لدراسة الابتكارات التنظيمية و فهم أفضل لإنشائها ، نشرها ودعمها باستخدام نظام استشرافى. تعتبر المفاهيم الثلاثة اى " الإنشاء " ، " النشر " ، و " الدعم " متشابكة جداً وينبغي عدم استكشاف كل مفهوم على حدى نظراً لأنه يقع إعادة إنشاء الابتكارات التنظيمية باستمرار .

ولذلك يمكن تصور نموذج لتحفيز التنمية التنظيمية والتغيير يركز على خمسة مراحل والتي تشكل نمطاً دائرياً يتمحور حول مسار تنظيمى محدد يعتمد خطأ تحسينياً نسبياً بدلا عن الابتكار التنظيمي الواحد. تتأثر هاته المراحل بالسياق الخارجى و الداخلى وخصائص الإبداع نفسها. بالإضافة الى ان مختلف قنوات النشر مثل الاستشاريين والجامعات، ومنتديات توحيد المعايير يمكن ان تشكل آليات لنقل المعارف والتأثير ايجابيا على مرحلة او اكثر من المراحل الخمسة. وضع النموذج استناداً إلى قراءتين للأبحاث التي أجريت على مدى فترة 14 عاماً ، والنتائج التي توصلت إليها اثنان من الدراسات التجريبية التي تغطي أربع شركات تصنيع سويدية ومستشفى واحد.

يتسم النموذج الشامل باستخدام أوسع وأعم ويمكن تطبيقه عبر انموذج "المراوح الثلاثة " وقد استخدم فعليا في الممارسة العملية في دراسة للوكالة "السويدية للابتكار " 'فينوفا' وأظهر نجاعة في تحليل كل من أوجه التشابه والاختلاف بين مختلف البرامج الوطنية لتحفيز التنمية التنظيمية وتغير المنظمات المختارة سلفاً.
